# Supplementary material for: DNA methylomic homogeneity and heterogeneity in muscles and testes throughout pig adulthood
Source: publisher site journal article supplement (doi:10.18632/aging.104143), 2020-11-20
Supplement: Supplementary file [file aging-v12i24-104143-supplementary-material-SD1.pdf]

Supplementary Figures

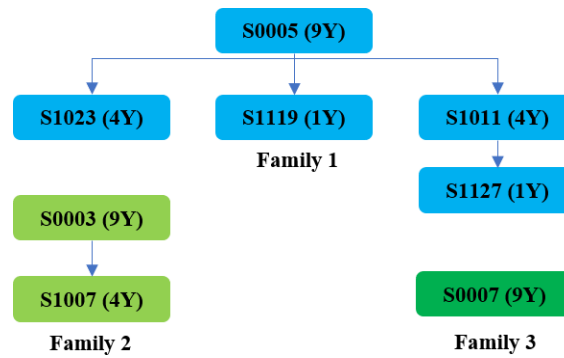

Supplementary Figure 1. The relationship and ages of BMX samples.

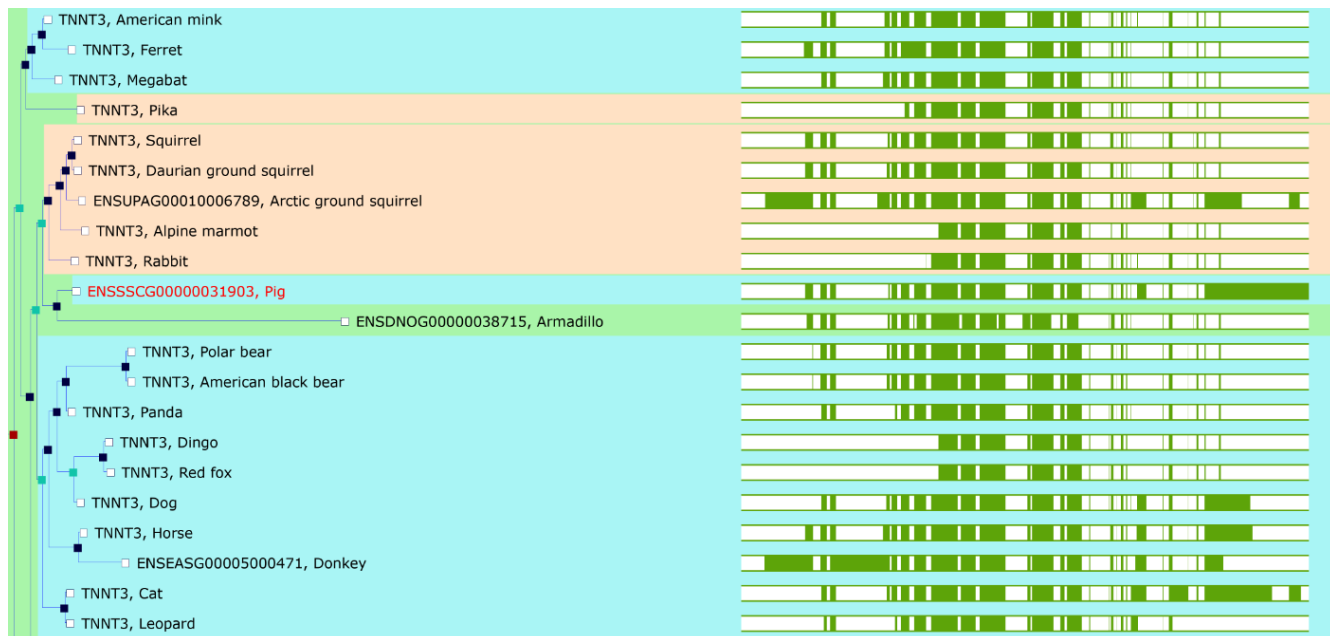

Supplementary Figure 2. The phylogenetic analyses of *ENSSCG00000031903*.

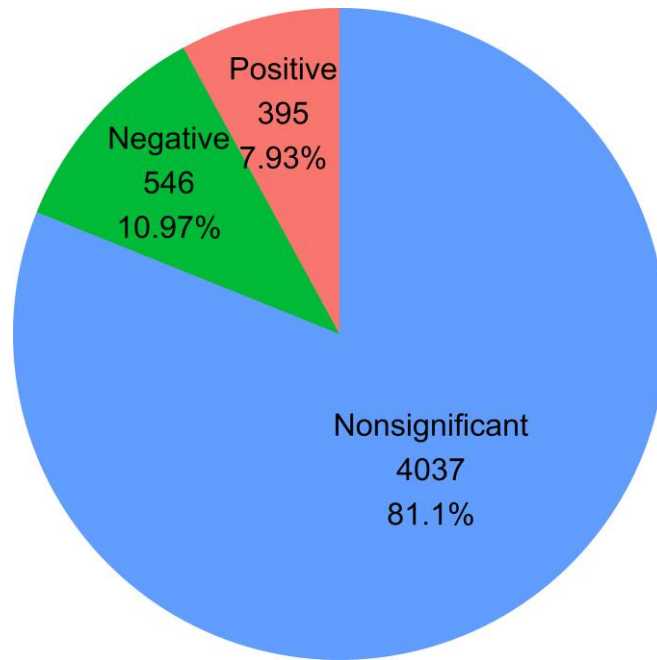

Supplementary Figure 3. The percent of genes whose expression levels are significantly correlated with DMCPGs.

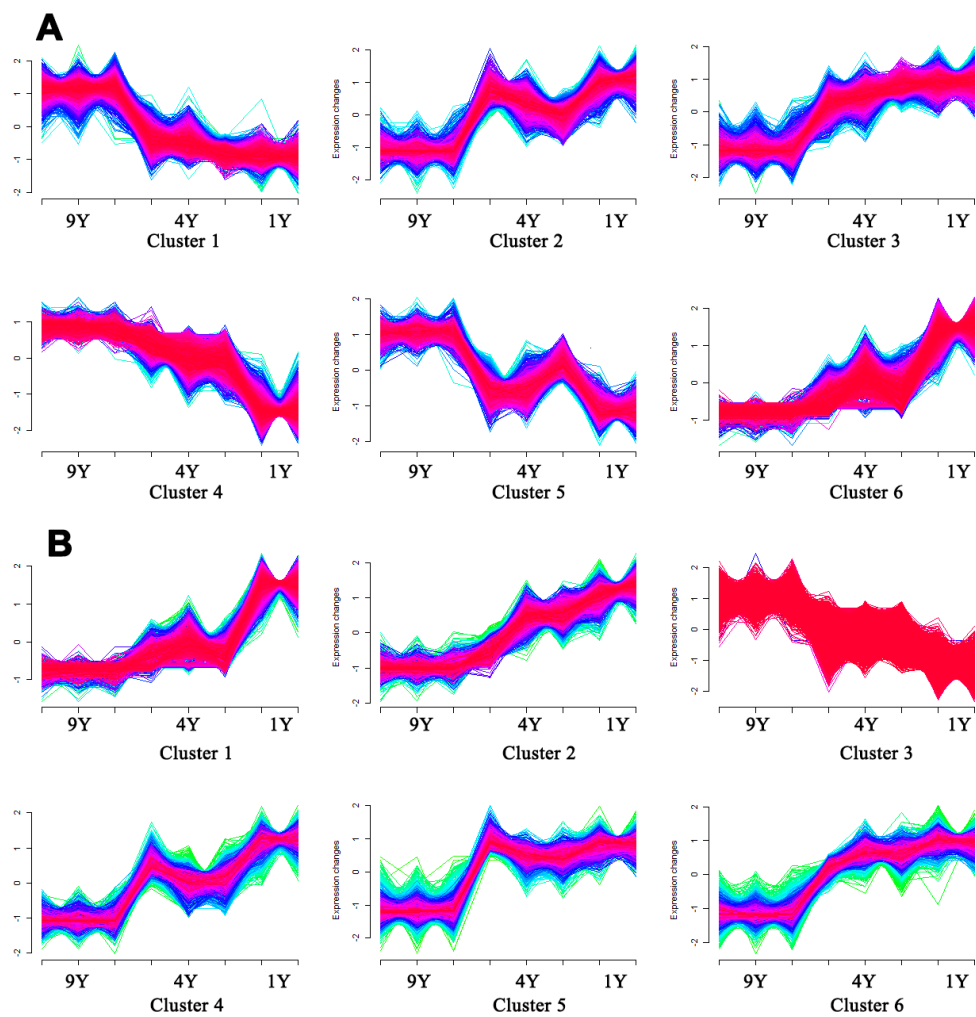

**Supplementary Figure 4. Dynamic methylation patterns with age in muscles and testes.** (A) Dynamic CpG patterns in muscles with age. (B) Dynamic CpG patterns in testes with age.
