# Supplementary material for: DNA methylomic homogeneity and heterogeneity in muscles and testes throughout pig adulthood
Source: publisher site journal article supplement (doi:10.18632/aging.104143), 2020-11-20
Supplement: Supplementary file [file aging-v12i24-104143-supplementary-material-SD2.pdf]

## Supplementary Table

**Supplementary Table 1. The distribution of CpGs over ten regions.**

| Term           | All      | 3' UTR  | 5' UTR | 5'TUR -<br>CGI | CGI     | CGIshore | CGIshelves | Off CGI  | Exon    | Intron   | Intergenic |
|----------------|----------|---------|--------|----------------|---------|----------|------------|----------|---------|----------|------------|
| All autosomal  | 55685213 | 1144772 | 939050 | 572002         | 5357203 | 6480234  | 2973362    | 40874414 | 5074619 | 28903302 | 21707292   |
| Raw ratio      | 1        | 0.0206  | 0.0169 | 0.0103         | 0.0962  | 0.1164   | 0.0534     | 0.7340   | 0.0911  | 0.5190   | 0.3898     |
| Filtered CpGs  | 34797932 | 655691  | 287284 | 62051          | 776576  | 3250115  | 1753194    | 29018047 | 2160187 | 18411778 | 14225967   |
| Filtered ratio | 1        | 0.0188  | 0.0083 | 0.0018         | 0.0223  | 0.0934   | 0.0504     | 0.8339   | 0.0621  | 0.5291   | 0.4088     |
| lower CpG      | 1147532  | 16818   | 88349  | 55218          | 326513  | 341143   | 26826      | 453050   | 170735  | 516505   | 460292     |
| Ratio          | 0.0330   | 0.0147  | 0.0770 | 0.0481         | 0.2845  | 0.2973   | 0.0234     | 0.3948   | 0.1488  | 0.4501   | 0.4011     |
| higher CpG     | 5743199  | 145592  | 32157  | 1187           | 92375   | 485406   | 329421     | 4835997  | 464017  | 3754422  | 1524760    |
| Ratio          | 0.1650   | 0.0254  | 0.0056 | 0.0002         | 0.0161  | 0.0845   | 0.0574     | 0.8420   | 0.0808  | 0.6537   | 0.2655     |
| tissues        | 4283350  | 78915   | 29870  | 1575           | 82321   | 472590   | 217902     | 3510537  | 269853  | 2206777  | 1806720    |
| Ratio          | 0.1231   | 0.1204  | 0.1040 | 0.0254         | 0.1060  | 0.1454   | 0.1243     | 0.1210   | 0.1249  | 0.1199   | 0.1270     |
| breeds         | 1147591  | 20396   | 7053   | 746            | 41244   | 121052   | 67001      | 918294   | 69177   | 635685   | 442729     |
| Ratio          | 0.0330   | 0.0311  | 0.0246 | 0.0120         | 0.0531  | 0.0372   | 0.0382     | 0.0316   | 0.0320  | 0.0345   | 0.0311     |
