# Supplementary material for: DNA methylomic homogeneity and heterogeneity in muscles and testes throughout pig adulthood
Source: publisher site journal article supplement (doi:10.18632/aging.104143), 2020-11-20
Supplement: Supplementary file [file aging-v12i24-104143-supplementary-material-SD5.pdf]

## SUPPLEMENTARY TABLES

Supplementary Table 4. DMRs between pedigrees in muscle and testis.

| Order | Tissue | Number | chr   | Start     | End       |
|-------|--------|--------|-------|-----------|-----------|
| 1     | muscle | 7      | chr14 | 132993657 | 132994115 |
| 2     | muscle | 6      | chr8  | 137555650 | 137556000 |
| 3     | muscle | 6      | chr14 | 139325615 | 139325622 |
| 4     | muscle | 6      | chr14 | 134435262 | 134435655 |
| 5     | muscle | 5      | chr9  | 133567706 | 133568064 |
| 6     | muscle | 5      | chr6  | 91043485  | 91043970  |
| 7     | muscle | 5      | chr2  | 9089167   | 9089395   |
| 8     | muscle | 5      | chr2  | 47019679  | 47019922  |
| 9     | muscle | 5      | chr17 | 3180528   | 3180816   |
| 10    | muscle | 5      | chr14 | 139177374 | 139177532 |
| 11    | muscle | 5      | chr14 | 135865240 | 135865613 |
| 12    | muscle | 5      | chr12 | 19603524  | 19604001  |
| 13    | muscle | 5      | chr12 | 13733513  | 13733579  |
| 14    | muscle | 5      | chr11 | 8690188   | 8690624   |
| 15    | muscle | 5      | chr11 | 8539607   | 8539965   |
| 16    | muscle | 5      | chr11 | 11704769  | 11704816  |
| 17    | muscle | 5      | chr10 | 51583348  | 51583562  |
| 18    | testis | 9      | chr9  | 212771    | 212893    |
| 19    | testis | 9      | chr2  | 151574805 | 151575091 |
| 20    | testis | 7      | chr4  | 106091605 | 106091699 |
| 21    | testis | 7      | chr14 | 28641275  | 28641374  |
| 22    | testis | 7      | chr11 | 77646658  | 77646933  |
| 23    | testis | 7      | chr1  | 272100179 | 272100279 |
| 24    | testis | 6      | chr6  | 28480020  | 28480147  |
| 25    | testis | 6      | chr3  | 36920813  | 36921180  |
| 26    | testis | 6      | chr15 | 56009163  | 56009234  |
| 27    | testis | 6      | chr14 | 134435262 | 134435655 |
| 28    | testis | 6      | chr14 | 133842967 | 133843194 |
| 29    | testis | 6      | chr13 | 199879841 | 199880019 |
| 30    | testis | 6      | chr13 | 145939217 | 145939337 |
| 31    | testis | 6      | chr12 | 37030932  | 37031353  |
| 32    | testis | 6      | chr11 | 51716401  | 51716819  |
| 33    | testis | 5      | chr9  | 43645730  | 43646210  |
| 34    | testis | 5      | chr9  | 133631712 | 133632099 |
| 35    | testis | 5      | chr9  | 130114358 | 130114527 |
| 36    | testis | 5      | chr8  | 25277540  | 25277627  |
| 37    | testis | 5      | chr7  | 94740385  | 94740732  |
| 38    | testis | 5      | chr7  | 4854047   | 4854157   |
| 39    | testis | 5      | chr7  | 1120310   | 1120435   |
| 40    | testis | 5      | chr6  | 81718383  | 81718863  |
| 41    | testis | 5      | chr6  | 461361    | 461433    |
| 42    | testis | 5      | chr6  | 43618518  | 43618845  |
| 43    | testis | 5      | chr6  | 152254780 | 152255169 |
| 44    | testis | 5      | chr5  | 93255108  | 93255188  |
| 45    | testis | 5      | chr5  | 9054371   | 9054615   |
| 46    | testis | 5      | chr5  | 83501529  | 83501851  |

|    |        |   |       |           |           |
|----|--------|---|-------|-----------|-----------|
| 47 | testis | 5 | chr4  | 62328215  | 62328295  |
| 48 | testis | 5 | chr4  | 41868339  | 41868461  |
| 49 | testis | 5 | chr4  | 129351476 | 129351937 |
| 50 | testis | 5 | chr3  | 1702150   | 1702289   |
| 51 | testis | 5 | chr3  | 16255470  | 16255535  |
| 52 | testis | 5 | chr3  | 110508569 | 110508776 |
| 53 | testis | 5 | chr2  | 88990833  | 88990886  |
| 54 | testis | 5 | chr2  | 6815401   | 6815852   |
| 55 | testis | 5 | chr2  | 59295363  | 59295652  |
| 56 | testis | 5 | chr2  | 39226566  | 39226744  |
| 57 | testis | 5 | chr2  | 1658708   | 1658848   |
| 58 | testis | 5 | chr2  | 140548352 | 140548438 |
| 59 | testis | 5 | chr18 | 2505488   | 2505932   |
| 60 | testis | 5 | chr17 | 9761541   | 9761933   |
| 61 | testis | 5 | chr17 | 29865514  | 29865914  |
| 62 | testis | 5 | chr16 | 49558122  | 49558191  |
| 63 | testis | 5 | chr16 | 45044933  | 45045071  |
| 64 | testis | 5 | chr16 | 3671532   | 3671693   |
| 65 | testis | 5 | chr14 | 9907095   | 9907265   |
| 66 | testis | 5 | chr14 | 73624262  | 73624403  |
| 67 | testis | 5 | chr14 | 138098493 | 138098957 |
| 68 | testis | 5 | chr14 | 136637468 | 136637968 |
| 69 | testis | 5 | chr13 | 73621572  | 73621803  |
| 70 | testis | 5 | chr13 | 207854405 | 207854841 |
| 71 | testis | 5 | chr12 | 6090884   | 6091214   |
| 72 | testis | 5 | chr12 | 4379572   | 4379698   |
| 73 | testis | 5 | chr12 | 18924477  | 18924618  |
| 74 | testis | 5 | chr12 | 13967609  | 13967737  |
| 75 | testis | 5 | chr11 | 723913    | 723951    |
| 76 | testis | 5 | chr11 | 5193167   | 5193383   |
| 77 | testis | 5 | chr11 | 4588027   | 4588100   |
| 78 | testis | 5 | chr11 | 11668788  | 11668941  |
| 79 | testis | 5 | chr10 | 51629956  | 51630323  |
| 80 | testis | 5 | chr10 | 20867433  | 20867532  |
| 81 | testis | 5 | chr1  | 207728    | 207779    |

**Supplementary Table 5. Sample size, covariates and covariances in BGLMM.**

| Analysis      | Sample size                  | Covariate | Covariance  |
|---------------|------------------------------|-----------|-------------|
| Ages (muscle) | 8 (2 1Ys, 3 4Ys, and 3 9Ys)  |           | relatedness |
| Ages (testis) | 8 (2 1Ys, 3 4Ys, and 3 9Ys)  |           | relatedness |
| Tissues       | 8 (muscle) vs 8 (testis)     | ages      | relatedness |
| Breeds        | 4 (LW) vs 8 (BMX)            |           |             |
| Pedigrees     | 2 (BMX) vs 5 (BMX)           |           |             |
| Genders       | 2 (male LW) vs 2 (female LW) |           |             |
